# Supplementary material for: Emerging investigator series: aqueous-phase processing of atmospheric aerosol influences dissolution kinetics of metal ions in an urban background site in the Po Valley
Source: Royal Society of Chemistry journal article supplement (doi:10.1039/d2em00023g), 2022-01-01
Supplement: d2em00023g1.pdf [file d2em00023g1.pdf]

Supplementary Information for

## Aqueous-phase processing of atmospheric aerosol influences dissolution kinetics of metal ions in an urban background site in the Po Valley

Chiara Giorio<sup>1,2\*</sup>, Sara D'Aronco<sup>1,2</sup>, Valerio Di Marco<sup>2</sup>, Denis Badocco<sup>2</sup>, Francesco Battaglia<sup>1,2,3</sup>, Lidia Soldà<sup>2</sup>, Paolo Pastore<sup>2</sup>, Andrea Tapparo<sup>2</sup>

<sup>1</sup> Yusuf Hamied Department of Chemistry, University of Cambridge, Lensfield Road, Cambridge, CB2 1EW, United Kingdom

<sup>2</sup> Dipartimento di Scienze Chimiche, Università degli Studi di Padova, Via Marzolo 1, 35131 Padova, Italy

<sup>3</sup> now at: Université de Paris and Univ Paris Est Creteil, CNRS, LISA, F-75013 Paris, France

### **Content**

9 Tables

3 Figures

**Table S1. Concentrations ( $\mu\text{g}/\text{m}^3$ ) of  $\text{PM}_{2.5}$  and water-soluble ions determined using ion chromatography. Ac = acetate, Fo = formate, MSA = methanesulphonate, Suc = succinate, Mal = malonate, Ox = oxalate.**

| Date       | $\text{PM}_{2.5}$ | $\text{Na}^+$ | $\text{NH}_4^+$ | $\text{K}^+$ | $\text{Mg}^{2+}$ | $\text{Ca}^{2+}$ | Ac <sup>-</sup> | Fo <sup>-</sup> | MSA <sup>-</sup> | Cl <sup>-</sup> | $\text{NO}_2^-$ | $\text{NO}_3^-$ | Suc <sup>2-</sup> | Mal <sup>2-</sup> | $\text{SO}_4^{2-}$ | Ox <sup>2-</sup> | $\text{PO}_4^{3-}$ |
|------------|-------------------|---------------|-----------------|--------------|------------------|------------------|-----------------|-----------------|------------------|-----------------|-----------------|-----------------|-------------------|-------------------|--------------------|------------------|--------------------|
| 01/02/2019 | 22                | 0.057         | 0.60            | 0.38         | 0.015            | 0.070            | 0.011           | 0.0033          | 0.012            | 0.061           | <LOD            | 1.4             | 0.0020            | 0.035             | 0.51               | 0.048            | 0.0022             |
| 05/02/2019 | 32                | 0.13          | 0.80            | 0.56         | 0.027            | 0.14             | 0.023           | 0.017           | 0.021            | 0.11            | 0.0019          | 2.4             | 0.011             | 0.0048            | 0.60               | 0.046            | 0.0087             |
| 08/02/2019 | 58                | 0.20          | 2.1             | 1.4          | 0.050            | 0.29             | 0.054           | 0.088           | 0.037            | 0.23            | 0.012           | 5.9             | 0.035             | 0.029             | 2.0                | 0.17             | 0.018              |
| 12/02/2019 | 19                | 0.083         | 1.0             | 0.66         | 0.026            | 0.15             | 0.015           | 0.015           | 0.024            | 0.079           | <LOD            | 3.5             | 0.0083            | 0.0051            | 0.68               | 0.047            | 0.0096             |
| 14/02/2019 | 54                | 0.14          | 3.8             | 1.2          | 0.041            | 0.21             | 0.062           | 0.082           | 0.058            | 0.16            | 0.010           | 11              | 0.021             | 0.035             | 1.8                | 0.19             | 0.018              |
| 18/02/2019 | 96                | 0.22          | 13              | 1.2          | 0.046            | 0.22             | 0.056           | 0.074           | 0.12             | 0.30            | 0.0067          | 33              | 0.046             | 0.17              | 3.8                | 0.43             | 0.018              |
| 20/02/2019 | 100               | 0.23          | 14              | 0.62         | 0.051            | 0.24             | 0.051           | 0.059           | 0.036            | 0.20            | 0.0013          | 35              | 0.035             | 0.11              | 4.6                | 0.40             | 0.0080             |
| 22/02/2019 | 84                | 0.30          | 13              | 0.94         | 0.044            | 0.20             | 0.051           | 0.041           | 0.10             | 0.25            | 0.0056          | 34              | 0.037             | 0.19              | 4.1                | 0.40             | 0.0094             |
| 26/02/2019 | 70                | 0.49          | 4.3             | 1.5          | 0.073            | 0.43             | 0.024           | 0.053           | 0.080            | 0.41            | 0.0043          | 14              | 0.027             | 0.0072            | 1.5                | 0.17             | 0.024              |
| 28/02/2019 | 51                | 0.12          | 4.8             | 0.57         | 0.037            | 0.20             | 0.027           | 0.015           | 0.070            | 0.43            | 0.0040          | 14              | 0.020             | 0.037             | 2.5                | 0.23             | 0.0063             |
| 04/03/2019 | 54                | 0.38          | 6.5             | 0.67         | 0.032            | 0.17             | 0.025           | 0.0061          | 0.051            | 0.35            | 0.0017          | 14              | 0.0030            | 0.078             | 5.0                | 0.31             | <LOD               |
| 06/03/2019 | 40                | 0.70          | 6.4             | 0.86         | 0.045            | 0.25             | 0.040           | 0.045           | 0.10             | 0.28            | 0.0067          | 16              | 0.025             | 0.078             | 4.2                | 0.31             | 0.014              |
| 08/03/2019 | 21                | 0.74          | 0.80            | 0.69         | 0.051            | 0.23             | 0.00053         | <LOD            | 0.039            | 0.43            | 0.0025          | 1.5             | 0.0028            | 0.0017            | 1.0                | 0.098            | <LOD               |
| 12/03/2019 | 8.7               | 0.30          | 0.40            | 0.50         | 0.041            | 0.31             | 0.00060         | <LOD            | 0.014            | 0.077           | 0.0018          | 0.81            | <LOD              | <LOD              | 0.11               | 0.014            | 0.0015             |
| 14/03/2019 | 41                | 0.23          | 3.8             | 0.45         | 0.035            | 0.22             | 0.028           | 0.020           | 0.042            | 0.094           | 0.0024          | 11              | 0.013             | 0.023             | 1.3                | 0.13             | 0.0050             |

**Table S2. Total concentrations (ng/m<sup>3</sup>) of elements in the PM<sub>2.5</sub> samples determined using inductively coupled plasma mass spectrometry.**

| Date       | Al  | As   | B   | Ba  | Cd   | Co    | Cr  | Cu  | Fe   | Ga   | Mn  | Ni  | Pb  | Rb   | Sr   | V    | Zn   |
|------------|-----|------|-----|-----|------|-------|-----|-----|------|------|-----|-----|-----|------|------|------|------|
| 01/02/2019 | 390 | 9.3  | 60  | 1.6 | 0.54 | 0.093 | 2.9 | 11  | 1827 | 47   | 8.4 | 55  | 3.7 | 1.5  | 2.7  | 0.88 | 372  |
| 05/02/2019 | 13  | 0.44 | 7.3 | 6.0 | 0.25 | 0.11  | 2.1 | 7.3 | 213  | 71   | 8.5 | 37  | 4.9 | 2.3  | 0.36 | 0.23 | 87   |
| 08/02/2019 | 21  | 0.72 | 12  | 7.7 | 0.59 | 0.11  | 21  | 15  | 302  | 1.2  | 9.5 | 28  | 9.7 | 2.9  | 0.59 | 0.88 | 97   |
| 12/02/2019 | 4.3 | 0.33 | 3.8 | 3.1 | 0.62 | 0.070 | 1.4 | 5.8 | 130  | 0.45 | 6.0 | 4.9 | 4.4 | 1.7  | 0.34 | 1.6  | 43   |
| 14/02/2019 | 16  | 0.69 | 9.7 | 75  | 3.1  | 0.10  | 32  | 20  | 2035 | 1.8  | 20  | 215 | 23  | 2.8  | 1.5  | 1.8  | 639  |
| 18/02/2019 | 167 | 1.3  | 20  | 8.5 | 0.89 | 0.10  | 4.2 | 16  | 1262 | 1.3  | 23  | 98  | 23  | 4.0  | 0.98 | 7.6  | 459  |
| 20/02/2019 | 26  | 0.95 | 16  | 13  | 0.40 | 0.12  | 121 | 26  | 605  | 1.0  | 15  | 5.5 | 11  | 2.8  | 0.60 | 2.4  | 112  |
| 22/02/2019 | 26  | 1.0  | 18  | 6.9 | 2.0  | 0.12  | 92  | 21  | 4335 | 3.9  | 43  | 23  | 18  | 2.3  | 0.60 | 2.0  | 1273 |
| 26/02/2019 | 31  | 15   | 9.9 | 15  | 2.0  | 0.19  | 11  | 35  | 834  | 22   | 20  | 19  | 37  | 7.1  | 2.2  | 0.53 | 497  |
| 28/02/2019 | 23  | 0.68 | 80  | 4.4 | 3.3  | 0.19  | 1.7 | 28  | 330  | 0.69 | 8.2 | 5.1 | 11  | 1.4  | 0.52 | 5.5  | 56   |
| 04/03/2019 | 33  | 0.53 | 8.2 | 2.0 | 0.45 | 0.12  | 14  | 32  | 2247 | 0.39 | 26  | 9.3 | 7.8 | 1.2  | 0.22 | 4.1  | 43   |
| 06/03/2019 | 185 | 23   | 9.2 | 24  | 0.97 | 0.086 | 104 | 30  | 5009 | 52   | 19  | 23  | 36  | 2.3  | 1.9  | 5.7  | 1140 |
| 08/03/2019 | 36  | 1.4  | 4.6 | 3.1 | 0.28 | 0.036 | 6.3 | 4.3 | 144  | 0.47 | 2.7 | 2.0 | 3.2 | 0.64 | 3.7  | 1.4  | 23   |
| 12/03/2019 | 293 | 11   | 123 | 26  | 0.46 | 0.039 | 36  | 34  | 418  | 14   | 6.3 | 33  | 1.3 | 1.0  | 2.4  | 1.9  | 326  |
| 14/03/2019 | 3.6 | 0.35 | 164 | 8.4 | 0.50 | 0.036 | 14  | 11  | 100  | 96   | 5.1 | 1.7 | 8.1 | 0.83 | 0.27 | 1.3  | 34   |

**Table S3. Kinetic constants  $k$  ( $\text{min}^{-1}$ ) of the solubilisation obtained for each element and all 15 samples for which a marked kinetic behaviour was observed. The corresponding standard deviations, computed from the fitting, are given in brackets. Dates are in dd/mm/yyyy format. Days with recorded fog events are highlighted in light blue.**

|            | Al                 | As                 | B                  | Ba                   | Cd               | Co               | Cr               | Cu                 | Fe                 | Ga                 | Mn                 | Ni                 | Rb               | Sr               | V                  | Zn                 |
|------------|--------------------|--------------------|--------------------|----------------------|------------------|------------------|------------------|--------------------|--------------------|--------------------|--------------------|--------------------|------------------|------------------|--------------------|--------------------|
| 01/02/2019 |                    | 0.016<br>(0.018)   | 0.25<br>(0.14)     | 0.0078<br>(0.0065)   |                  |                  |                  | 0.0074<br>(0.0044) | 0.022<br>(0.014)   | 0.043<br>(0.015)   | 0.060<br>(0.013)   |                    | 0.35<br>(0.15)   | 0.11<br>(0.13)   |                    | 0.067<br>(0.010)   |
| 05/02/2019 |                    | 0.0169<br>(0.0091) |                    | 0.0320<br>(0.0075)   | 1.2<br>(1.2)     | 0.053<br>(0.032) |                  | 0.0198<br>(0.0062) | 0.046<br>(0.011)   | 0.0340<br>(0.0036) | 0.0429<br>(0.0087) | 0.038<br>(0.019)   | 0.054<br>(0.037) | 0.044<br>(0.038) |                    | 0.056<br>(0.014)   |
| 08/02/2019 | 0.022<br>(0.026)   | 0.206<br>(0.091)   |                    | 0.0050<br>(0.0015)   | 0.24<br>(0.10)   |                  |                  | 0.0053<br>(0.0046) | 0.038<br>(0.012)   | 0.033<br>(0.017)   | 0.044<br>(0.014)   |                    |                  | 0.25<br>(0.12)   | 0.036<br>(0.018)   | 0.069<br>(0.022)   |
| 12/02/2019 |                    | 0.057<br>(0.026)   |                    | 0.015<br>(0.018)     | 0.073<br>(0.028) | 0.097<br>(0.056) |                  | 0.0244<br>(0.0080) | 0.0053<br>(0.0080) |                    | 0.026<br>(0.010)   | 0.0149<br>(0.0030) | 0.148<br>(0.090) |                  | 0.022<br>(0.010)   | 0.154<br>(0.076)   |
| 14/02/2019 | 0.019<br>(0.014)   | 0.028<br>(0.024)   |                    | 0.0133<br>(0.0033)   | 0.083<br>(0.040) |                  |                  | 0.0116<br>(0.0070) | 0.0029<br>(0.0024) | 0.0105<br>(0.0072) | 0.0177<br>(0.0061) | 0.022<br>(0.010)   | 0.053<br>(0.028) | 0.013<br>(0.010) | 0.0228<br>(0.0051) | 0.054<br>(0.016)   |
| 18/02/2019 |                    | 0.018<br>(0.022)   | 0.0124<br>(0.0080) | 0.0050<br>(0.0026)   | 0.131<br>(0.068) |                  | 0.016<br>(0.016) | 0.0067<br>(0.0063) | 0.058<br>(0.010)   |                    | 0.071<br>(0.022)   | 0.030<br>(0.011)   |                  | 0.041<br>(0.035) | 0.0085<br>(0.0090) | 0.137<br>(0.028)   |
| 20/02/2019 |                    |                    |                    | 0.035<br>(0.018)     |                  |                  | 0.14<br>(0.10)   | 0.0304<br>(0.0057) | 0.048<br>(0.010)   |                    | 0.0121<br>(0.0037) | 0.041<br>(0.017)   |                  |                  | 0.023<br>(0.011)   | 0.13<br>(0.15)     |
| 22/02/2019 |                    |                    | 0.103<br>(0.075)   | 0.0169<br>(0.0027)   | 0.132<br>(0.046) |                  | 0.061<br>(0.039) | 0.047<br>(0.015)   | 0.049<br>(0.011)   | 0.036<br>(0.017)   | 0.063<br>(0.010)   | 0.051<br>(0.034)   | 0.034<br>(0.031) |                  | 0.17<br>(0.12)     | 0.0472<br>(0.0092) |
| 26/02/2019 |                    | 0.0242<br>(0.0076) | 0.034<br>(0.019)   | 0.0098<br>(0.0015)   | 0.134<br>(0.064) |                  |                  | 0.0117<br>(0.0057) | 0.0148<br>(0.0032) | 0.054<br>(0.015)   | 0.0389<br>(0.0091) | 0.028<br>(0.020)   |                  | 0.071<br>(0.038) |                    | 0.104<br>(0.016)   |
| 28/02/2019 |                    |                    |                    | 0.0044<br>(0.0017)   | 0.044<br>(0.021) | 0.25<br>(0.11)   | 0.055<br>(0.060) |                    | 0.009<br>(0.013)   | 0.0112<br>(0.0085) | 0.206<br>(0.066)   |                    |                  | 0.021<br>(0.020) | 0.038<br>(0.014)   | 0.222<br>(0.027)   |
| 04/03/2019 |                    |                    |                    | 0.0212<br>(0.0085)   |                  |                  | 0.075<br>(0.039) | 0.065<br>(0.040)   |                    | 0.093<br>(0.049)   | 0.178<br>(0.067)   | 0.025<br>(0.023)   |                  |                  |                    |                    |
| 06/03/2019 | 0.104<br>(0.062)   |                    |                    | 0.0201<br>(0.0034)   |                  |                  |                  |                    | 0.048<br>(0.030)   | 0.062<br>(0.027)   | 0.323<br>(0.046)   |                    |                  |                  |                    | 0.310<br>(0.046)   |
| 08/03/2019 | 0.009<br>(0.027)   |                    |                    | 0.0062<br>(0.0022)   |                  |                  |                  | 0.114<br>(0.057)   | 0.068<br>(0.096)   |                    | 0.069<br>(0.043)   | 0.038<br>(0.016)   |                  |                  |                    | 0.159<br>(0.032)   |
| 12/03/2019 | 0.0138<br>(0.0046) |                    |                    | 0.0258<br>(0.0040)   |                  |                  |                  | 0.0230<br>(0.0048) | 0.0112<br>(0.0021) | 0.0229<br>(0.0078) | 0.0053<br>(0.0080) | 0.010<br>(0.011)   |                  |                  |                    | 0.020<br>(0.016)   |
| 14/03/2019 |                    |                    |                    | 0.01295<br>(0.00099) |                  |                  |                  | 0.026<br>(0.012)   | 0.0215<br>(0.0050) | 0.021<br>(0.011)   | 0.145<br>(0.036)   |                    |                  |                  | 0.009<br>(0.016)   | 0.258<br>(0.044)   |

**Table S4. Half-time  $t_{1/2}$  (min) of the solubilisation obtained for each element and all 15 samples for which a marked kinetic behaviour was observed. The corresponding standard deviations, computed from the fitting, are given in brackets. Dates are in dd/mm/yyyy format. Days with recorded fog events are highlighted in light blue.**

|            | Al        | As         | B         | Ba         | Cd          | Co         | Cr         | Cu         | Fe         | Ga         | Mn          | Ni         | Rb          | Sr        | V          | Zn          |
|------------|-----------|------------|-----------|------------|-------------|------------|------------|------------|------------|------------|-------------|------------|-------------|-----------|------------|-------------|
| 01/02/2019 |           | 44 (50)    | 2.7 (1.5) | 89 (75)    |             |            |            | 94 (56)    | 31 (19)    | 16.0 (5.7) | 11.6 (2.5)  |            | 2.00 (0.86) | 6.1 (6.9) |            | 10.4 (1.6)  |
| 05/02/2019 |           | 41 (22)    |           | 21.7 (5.1) | 0.60 (0.65) | 13.0 (7.8) |            | 35 (11)    | 15.2 (3.8) | 20.4 (2.2) | 16.2 (3.3)  | 18.3 (9.3) | 12.9 (8.9)  | 16 (13)   |            | 12.4 (3.2)  |
| 08/02/2019 | 31 (36)   | 3.4 (1.5)  |           | 140 (41)   | 2.9 (1.2)   |            |            | 131 (115)  | 18.3 (5.8) | 21 (11)    | 15.6 (4.8)  |            |             | 2.8 (1.3) | 19.1 (9.3) | 10.1 (3.2)  |
| 12/02/2019 |           | 12.1 (5.5) |           | 45 (52)    | 9.4 (3.6)   | 7.1 (4.1)  |            | 28.5 (9.4) | 130 (195)  |            | 27 (11)     | 46.5 (9.2) | 4.7 (2.8)   |           | 31 (14)    | 4.5 (2.2)   |
| 14/02/2019 | 37 (29)   | 24 (20)    |           | 52 (13)    | 8.4 (4.0)   |            |            | 60 (36)    | 242 (200)  | 66 (45)    | 39 (13)     | 31 (14)    | 13.1 (6.9)  | 55 (44)   | 30.5 (6.8) | 12.7 (3.7)  |
| 18/02/2019 |           | 38 (44)    | 56 (36)   | 140 (72)   | 5.3 (2.7)   |            | 44 (46)    | 103 (96)   | 11.9 (2.1) |            | 9.8 (3.0)   | 23.5 (8.5) |             | 17 (14)   | 82 (86)    | 5.1 (1.0)   |
| 20/02/2019 |           |            |           | 20 (10)    |             |            | 4.8 (3.4)  | 22.8 (4.2) | 14.5 (3.2) |            | 57 (17)     | 17.0 (7.0) |             |           | 30 (15)    | 5.3 (6.0)   |
| 22/02/2019 |           |            | 6.8 (4.9) | 40.9 (6.6) | 5.2 (1.8)   |            | 11.4 (7.3) | 14.9 (4.7) | 14.1 (3.0) | 19.2 (8.9) | 11.0 (1.8)  | 13.5 (9.0) | 20 (18)     |           | 4.2 (3.1)  | 14.7 (2.9)  |
| 26/02/2019 |           | 28.6 (9.0) | 21 (11)   | 71 (11)    | 5.2 (2.5)   |            |            | 59 (29)    | 47 (10)    | 12.8 (3.6) | 17.8 (4.2)  | 24 (17)    |             | 9.7 (5.2) |            | 6.7 (1.0)   |
| 28/02/2019 |           |            |           | 157 (61)   | 15.7 (7.6)  | 2.8 (1.2)  | 13 (14)    |            | 81 (125)   | 62 (47)    | 3.4 (1.1)   |            |             | 33 (31)   | 18.4 (6.7) | 3.13 (0.39) |
| 04/03/2019 |           |            |           | 33 (13)    |             |            | 9.3 (4.8)  | 10.6 (6.5) |            | 7.5 (3.9)  | 3.9 (1.5)   | 28 (26)    |             |           |            |             |
| 06/03/2019 | 6.7 (4.0) |            |           | 34.5 (5.7) |             |            |            |            | 14.4 (8.9) | 11.1 (4.8) | 2.14 (0.31) |            |             |           |            | 2.24 (0.33) |
| 08/03/2019 | 81 (258)  |            |           | 112 (39)   |             |            |            | 6.1 (3.1)  | 10 (14)    |            | 10.0 (6.2)  | 18.2 (7.6) |             |           |            | 4.37 (0.87) |
| 12/03/2019 | 50 (17)   |            |           | 26.8 (4.1) |             |            |            | 30.1 (6.3) | 62 (12)    | 30 (10)    | 132 (199)   | 67 (73)    |             |           | 81 (147)   | 34 (26)     |
| 14/03/2019 |           |            |           | 53.5 (4.1) |             |            |            | 26 (12)    | 32.2 (7.4) | 33 (17)    | 4.8 (1.2)   |            |             |           |            | 2.69 (0.46) |

**Table S5. Concentrations (ng/m<sup>3</sup>) of water-soluble elements in the PM<sub>2.5</sub> samples at  $t = 2$  min of the kinetics experiments determined using inductively coupled plasma mass spectrometry.**

| Date       | Al   | As   | B    | Ba    | Cd    | Co     | Cr    | Cu  | Fe  | Ga    | Mn   | Ni     | Pb   | Rb   | Sr    | V      | Zn  |
|------------|------|------|------|-------|-------|--------|-------|-----|-----|-------|------|--------|------|------|-------|--------|-----|
| 01/02/2019 | 0.36 | 0.17 | 0.29 | <LOD  | 0.029 | <LOD   | 0.069 | 1.2 | 3.0 | <LOD  | 1.3  | 0.0010 | 0.77 | 1.0  | 0.056 | 0.10   | 12  |
| 05/02/2019 | 5.1  | 0.31 | 2.2  | 1.2   | 0.029 | <LOD   | 1.4   | 2.0 | 8.2 | 0.25  | 2.4  | 0      | 1.4  | 1.5  | 0.20  | 0.23   | 29  |
| 08/02/2019 | 7.7  | 0.39 | 6.9  | 0.64  | 0.029 | 0.012  | 4.0   | 3.5 | 23  | 0.21  | 3.4  | 0.24   | 2.5  | 2.6  | 0.29  | 0.34   | 40  |
| 12/02/2019 | 8.8  | 0.20 | 3.5  | 1.6   | 0.029 | 0.0038 | 0.52  | 2.5 | 7.0 | 0.34  | 2.6  | 1.2    | 2.4  | 1.7  | 0.28  | 0.37   | 32  |
| 14/02/2019 | 19   | 0.60 | 10   | 2.1   | 0.49  | 0.0338 | 1.0   | 4.8 | 16  | 0.47  | 6.7  | 0.56   | 4.1  | 2.9  | 0.39  | 1.0    | 76  |
| 18/02/2019 | 12   | 0.96 | 16   | 4.2   | 0.59  | 0.036  | 0.97  | 6.7 | 51  | 0.73  | 8.3  | 0.92   | 8.3  | 3.4  | 0.45  | 2.7    | 97  |
| 20/02/2019 | 14   | 0.86 | 18   | 4.8   | 0.41  | 0.057  | 0.98  | 8.9 | 68  | 0.92  | 8.4  | 1.3    | 6.4  | 2.4  | 0.50  | 2.3    | 78  |
| 22/02/2019 | 13   | 0.85 | 16   | 2.4   | 0.56  | 0.040  | 1.1   | 7.7 | 47  | 0.50  | 8.9  | 0.87   | 6.9  | 2.5  | 0.34  | 1.8    | 96  |
| 26/02/2019 | 15   | 0.52 | 6.3  | 2.3   | 0.65  | 0.039  | 0.85  | 5.5 | 18  | 0.43  | 7.8  | 0.42   | 4.3  | 3.2  | 1.0   | 0.26   | 102 |
| 28/02/2019 | 12   | 0.51 | 8.4  | 1.5   | 1.6   | 0.091  | 0.41  | 4.3 | 21  | 0.28  | 3.1  | 1.1    | 3.1  | 1.3  | 0.30  | 3.7    | 32  |
| 04/03/2019 | 1.9  | <LOD | 13   | 0.21  | 0.21  | 0.020  | 0.54  | 4.4 | 26  | 0.076 | 3.4  | 1.2    | 2.5  | 1.2  | 0.16  | 3.7    | 37  |
| 06/03/2019 | 1.5  | <LOD | 4.8  | 0.12  | 0.081 | <LOD   | 0.27  | 3.6 | 15  | 0.067 | 1.9  | 0.85   | 3.2  | 0.85 | 0.20  | 2.6    | 18  |
| 08/03/2019 | 0.73 | <LOD | <LOD | 0.34  | <LOD  | <LOD   | 0.084 | 2.7 | 3.8 | 0.056 | 0.93 | 0.26   | 0.89 | 0.52 | 0.31  | 0.78   | 13  |
| 12/03/2019 | 1.1  | <LOD | <LOD | 0.092 | <LOD  | <LOD   | 0.025 | 2.3 | 1.4 | 0.047 | 1.5  | 0.14   | 0.49 | 0.34 | 0.17  | 0.0081 | 15  |
| 14/03/2019 | 1.3  | <LOD | 1.4  | 0.062 | 0.16  | <LOD   | 0.15  | 3.0 | 7.9 | 0.053 | 1.8  | 0.34   | 3.3  | 0.66 | 0.17  | 0.75   | 17  |

**Table S6. Concentrations (ng/m<sup>3</sup>) of water-soluble elements in the PM<sub>2.5</sub> samples at  $t > 60$  min of the kinetics experiments determined using inductively coupled plasma mass spectrometry.**

| Date       | Al  | As   | B    | Ba  | Cd     | Co     | Cr    | Cu  | Fe  | Ga   | Mn  | Ni    | Pb   | Rb   | Sr   | V     | Zn  |
|------------|-----|------|------|-----|--------|--------|-------|-----|-----|------|-----|-------|------|------|------|-------|-----|
| 01/02/2019 | 2.6 | 0.22 | 2.6  | 2.7 | 0.029  | <LOD   | 0.12  | 1.4 | 4.2 | 0.18 | 1.7 | 0.081 | 0.62 | 1.1  | 0.11 | 0.16  | 17  |
| 05/02/2019 | 7.1 | 0.37 | 4.3  | 4.3 | 0.029  | 0.013  | 1.3   | 3.0 | 12  | 0.45 | 2.8 | 0.10  | 1.9  | 1.6  | 0.31 | 0.24  | 35  |
| 08/02/2019 | 16  | 0.53 | 8.8  | 9.1 | 0.029  | 0.017  | 3.4   | 4.5 | 30  | 0.79 | 4.0 | 0.35  | 2.1  | 2.6  | 0.51 | 0.58  | 46  |
| 12/02/2019 | 9.2 | 0.31 | 4.4  | 2.3 | 0.029  | 0.007  | 0.49  | 4.0 | 16  | 0.46 | 3.0 | 1.7   | 3.3  | 1.8  | 0.31 | 0.87  | 39  |
| 14/02/2019 | 25  | 0.68 | 13   | 9.5 | 0.55   | 0.043  | 1.5   | 7.1 | 37  | 0.99 | 7.9 | 0.94  | 5.0  | 3.0  | 0.58 | 1.4   | 88  |
| 18/02/2019 | 13  | 0.97 | 20   | 9.5 | 0.67   | 0.040  | 1.0   | 7.7 | 57  | 0.81 | 9.3 | 1.2   | 6.2  | 3.4  | 0.50 | 2.9   | 115 |
| 20/02/2019 | 23  | 0.90 | 20   | 5.8 | 0.53   | 0.060  | 1.0   | 11  | 86  | 1.0  | 9.4 | 1.6   | 7.8  | 2.4  | 0.58 | 2.6   | 82  |
| 22/02/2019 | 17  | 0.93 | 19   | 8.7 | 0.69   | 0.042  | 1.2   | 8.3 | 52  | 0.75 | 10  | 1.0   | 4.9  | 2.6  | 0.47 | 1.9   | 105 |
| 26/02/2019 | 16  | 0.79 | 11   | 15  | 0.73   | 0.046  | 0.93  | 7.3 | 27  | 1.1  | 8.7 | 0.54  | 3.4  | 3.3  | 1.1  | 0.32  | 118 |
| 28/02/2019 | 14  | 0.52 | 11   | 8.2 | 1.7    | 0.11   | 0.45  | 4.9 | 24  | 0.62 | 3.7 | 1.5   | 2.4  | 1.3  | 0.43 | 4.0   | 45  |
| 04/03/2019 | 5.2 | <LOD | 13   | 2.6 | 0.37   | 0.0042 | 0.66  | 5.3 | 28  | 0.20 | 4.1 | 1.5   | 4.5  | 1.2  | 0.23 | 4.0   | 42  |
| 06/03/2019 | 6.0 | <LOD | 6.3  | 2.0 | 0.15   | <LOD   | 0.56  | 4.3 | 19  | 0.16 | 3.1 | 1.5   | 3.8  | 0.89 | 0.22 | 2.9   | 36  |
| 08/03/2019 | 1.5 | <LOD | 0.39 | 3.5 | 0.016  | <LOD   | 0.080 | 2.9 | 4.2 | 0.16 | 1.1 | 0.45  | 0.91 | 0.53 | 0.32 | 1.0   | 19  |
| 12/03/2019 | 3.7 | <LOD | <LOD | 1.0 | 0.0027 | <LOD   | 0.026 | 3.3 | 5.5 | 0.13 | 1.8 | 0.20  | 0.67 | 0.34 | 0.20 | 0.020 | 17  |
| 14/03/2019 | 1.9 | <LOD | 2.3  | 1.9 | 0.25   | <LOD   | 0.18  | 3.6 | 10  | 0.13 | 2.4 | 0.47  | 4.7  | 0.71 | 0.17 | 0.90  | 28  |

**Table S7. Speciation of each metal in deliquescent aerosol, obtained with the model Visual Minteq, as percent distribution of the different chemical species.**

| Component                              | Species name                                   | 01/02/<br>2019 | 05/02/<br>2019 | 08/02/<br>2019 | 12/02/<br>2019 | 14/02/<br>2019 | 18/02/<br>2019 | 20/02/<br>2019 | 22/02/<br>2019 | 26/02/<br>2019 | 28/02/<br>2019 | 04/03/<br>2019 | 06/03/<br>2019 | 08/03/<br>2019 | 12/03/<br>2019* | 14/03/<br>2019 |
|----------------------------------------|------------------------------------------------|----------------|----------------|----------------|----------------|----------------|----------------|----------------|----------------|----------------|----------------|----------------|----------------|----------------|-----------------|----------------|
| Al(III)                                | Al <sup>3+</sup>                               | 10.79          | 0.02           |                | 0.02           | 0.01           |                | 0.03           |                | 0.02           |                | 0.08           |                | 0.46           |                 |                |
|                                        | AlOH <sup>2+</sup>                             |                |                |                |                |                |                |                |                |                |                |                |                | 0.05           |                 |                |
|                                        | AlCl <sup>2+</sup>                             | 0.01           | 0.06           | 0.04           | 0.11           | 0.04           |                |                |                | 0.14           | 0.07           |                |                | 0.34           |                 | 0.01           |
|                                        | AlSO <sub>4</sub> <sup>+</sup>                 | 23.70          | 43.63          | 40.48          | 63.09          | 42.32          | 2.73           | 13.80          | 2.63           | 50.66          | 44.56          | 21.76          | 28.31          | 15.08          |                 | 28.19          |
|                                        | Al(SO <sub>4</sub> ) <sub>2</sub> <sup>-</sup> | 5.13           | 8.36           | 13.85          | 10.59          | 9.83           | 0.57           | 3.11           | 0.57           | 7.44           | 13.80          | 12.31          | 13.85          | 0.03           |                 | 6.14           |
|                                        | AlHPO <sub>4</sub> <sup>+</sup>                | 0.03           |                |                |                |                | 0.21           | 0.14           | 0.05           | 0.01           |                |                | 0.38           |                |                 | 1.20           |
|                                        | Al-(Malonate) <sub>2</sub> <sup>-</sup>        | 0.15           |                |                |                |                | 22.79          | 2.07           | 22.25          |                |                | 0.76           | 6.04           | 0.43           |                 | 5.46           |
|                                        | Al-Malonate <sup>+</sup>                       | 5.14           | 0.02           |                |                | 0.07           | 21.38          | 14.08          | 20.48          | 0.02           | 0.01           | 6.61           | 22.80          | 73.44          |                 | 32.72          |
|                                        | Al-Succinate <sup>+</sup>                      |                |                |                |                |                |                |                | 0.02           |                |                |                |                |                | 0.06            |                |
|                                        | AlH-Oxalate <sup>2+</sup>                      | 0.27           | 1.09           | 2.28           | 5.34           | 0.84           |                |                |                |                | 0.98           | 1.37           | 0.04           |                |                 |                |
|                                        | AlOH-Oxalate                                   | 0.04           |                |                |                |                |                | 0.07           | 0.21           | 0.09           |                |                | 0.03           | 0.02           | 0.07            | 0.04           |
|                                        | Al-(Oxalate) <sub>3</sub> <sup>3-</sup>        | 0.39           |                |                |                |                |                |                |                |                |                |                | 0.05           |                |                 |                |
|                                        | Al-(Oxalate) <sub>2</sub> <sup>-</sup>         | 14.77          | 7.13           | 10.19          | 1.18           | 8.39           | 32.55          | 27.08          | 34.23          | 4.46           | 8.28           | 27.84          | 8.31           | 0.01           |                 | 4.21           |
| Al-Oxalate <sup>+</sup>                | 39.57                                          | 39.68          | 33.16          | 19.66          | 38.49          | 19.69          | 39.45          | 19.68          | 36.26          | 31.90          | 30.53          | 20.27          | 10.00          |                | 22.01           |                |
| Cr(III)                                | Cr(OH) <sub>2</sub> <sup>+</sup>               |                |                |                |                |                |                |                |                |                |                |                |                | 0.04           |                 |                |
|                                        | Cr <sup>3+</sup>                               | 45.05          | 0.09           | 0.05           | 0.11           | 0.07           | 0.09           | 0.62           | 0.08           | 0.13           | 0.06           | 1.19           | 0.04           | 7.58           |                 | 0.09           |
|                                        | CrOH <sup>2+</sup>                             | 0.11           |                |                |                |                | 0.08           | 0.24           | 0.09           |                |                | 0.05           | 0.02           | 21.49          |                 | 0.04           |
|                                        | CrCl <sup>2+</sup>                             | 0.02           | 0.11           | 0.09           | 0.21           | 0.07           | 0.06           | 0.02           | 0.03           | 0.35           | 0.19           | 0.04           | 0.03           | 2.36           |                 | 0.04           |
|                                        | CrSO <sub>4</sub> <sup>+</sup>                 | 37.84          | 95.20          | 98.40          | 98.42          | 95.59          | 99.35          | 98.87          | 99.55          | 96.11          | 98.74          | 98.62          | 99.76          | 65.76          |                 | 99.37          |
|                                        | CrOHSO <sub>4</sub> (aq)                       |                |                |                |                |                | 0.08           | 0.10           | 0.08           |                |                | 0.03           | 0.04           | 0.21           |                 | 0.04           |
|                                        | CrNH <sub>3</sub> <sup>3+</sup>                |                |                |                |                |                |                |                |                |                |                |                |                | 0.17           |                 |                |
|                                        | CrNO <sub>3</sub> <sup>2+</sup>                | 0.02           | 0.14           | 0.12           | 0.43           | 0.24           | 0.31           | 0.15           | 0.16           | 0.70           | 0.32           | 0.07           | 0.08           | 2.38           |                 | 0.37           |
|                                        | CrH <sub>2</sub> PO <sub>4</sub> <sup>2+</sup> | 0.01           | 0.02           |                | 0.01           | 0.01           | 0.04           |                |                | 0.06           |                |                | 0.04           |                |                 | 0.05           |
|                                        | Cr-Acetate <sup>2+</sup>                       | 16.95          | 4.44           | 1.32           | 0.81           | 4.01           |                |                |                | 2.64           | 0.68           |                |                |                |                 |                |
| Cr-(Acetate) <sub>2</sub> <sup>+</sup> |                                                | 0.02           |                |                | 0.02           |                |                |                |                |                |                |                |                |                |                 |                |



|                               |                                                   |       |       |       |       |       |       |       |       |       |       |       |       |       |       |
|-------------------------------|---------------------------------------------------|-------|-------|-------|-------|-------|-------|-------|-------|-------|-------|-------|-------|-------|-------|
| <b>Cu(II)</b>                 | <b>Cu<sup>2+</sup></b>                            | 54.92 | 0.35  | 0.22  | 0.12  | 0.12  | 0.12  | 1.68  | 0.25  | 0.08  | 0.09  | 4.56  | 0.33  | 3.58  | 0.10  |
|                               | <b>CuCl<sup>+</sup></b>                           | 0.47  | 1.56  | 1.24  | 0.71  | 0.37  | 0.25  | 0.28  | 0.27  | 0.66  | 0.82  | 1.09  | 0.65  | 3.21  | 0.15  |
|                               | <b>CuCl<sub>2</sub> (aq)</b>                      |       | 0.05  | 0.05  | 0.04  |       |       |       |       | 0.05  | 0.07  |       | 0.01  | 0.03  |       |
|                               | <b>CuSO<sub>4</sub> (aq)</b>                      | 17.08 | 1.60  | 1.77  | 0.48  | 0.66  | 0.59  | 3.93  | 1.31  | 0.27  | 0.63  | 14.39 | 3.86  | 0.15  | 0.52  |
|                               | <b>CuHSO<sub>4</sub><sup>+</sup></b>              | 0.16  | 0.86  | 2.33  | 2.45  | 0.28  |       |       |       | 0.14  | 0.50  | 0.10  | 0.02  |       |       |
|                               | <b>CuNH<sub>3</sub><sup>2+</sup></b>              |       |       |       |       |       |       |       | 0.02  |       |       |       |       |       | 0.12  |
|                               | <b>CuNO<sub>3</sub><sup>+</sup></b>               | 12.37 | 57.62 | 47.72 | 40.71 | 42.08 | 40.85 | 67.61 | 50.08 | 35.67 | 36.53 | 56.91 | 54.64 | 84.43 | 39.34 |
|                               | <b>Cu(NO<sub>3</sub>)<sub>2</sub> (aq)</b>        | 0.14  | 35.02 | 39.43 | 52.45 | 55.46 | 52.84 | 20.52 | 37.20 | 62.69 | 59.75 | 9.33  | 34.52 | 7.87  | 59.03 |
|                               | <b>CuH-Malonate<sup>+</sup></b>                   | 5.06  | 0.07  | 0.05  |       | 0.07  | 1.50  | 0.86  | 2.58  |       | 0.02  | 5.03  | 3.23  | 0.12  | 0.39  |
|                               | <b>Cu-(Malonate)<sub>2</sub><sup>2-</sup></b>     |       |       |       |       |       |       |       |       | 0.01  |       | 2.70  |       |       |       |
|                               | <b>Cu-Malonate (aq)</b>                           | 2.10  |       |       |       |       | 2.76  | 2.33  | 5.92  |       |       |       | 1.95  | 0.46  | 0.36  |
|                               | <b>CuH-Succinate<sup>+</sup></b>                  |       |       |       |       |       | 0.03  | 0.12  | 0.06  |       |       |       | 0.01  | 0.01  |       |
|                               | <b>Cu-(Oxalate)<sub>2</sub><sup>2-</sup></b>      | 0.69  |       |       |       |       | 0.03  | 0.07  | 0.07  |       |       | 0.33  |       |       |       |
|                               | <b>Cu-Oxalate (aq)</b>                            | 6.12  | 0.31  | 0.34  | 0.04  | 0.13  | 0.99  | 2.51  | 2.18  | 0.05  | 0.11  | 4.96  | 0.70  | 0.03  | 0.10  |
|                               | <b>CuH-Oxalate<sup>+</sup></b>                    | 0.86  | 2.55  | 6.85  | 3.00  | 0.83  | 0.03  | 0.06  | 0.06  | 0.40  | 1.47  | 0.57  | 0.07  |       |       |
| <b>Cu-Acetate<sup>+</sup></b> | 0.02                                              |       |       |       |       |       |       |       |       |       |       |       |       |       |       |
| <b>Fe(III)</b>                | <b>Fe<sup>3+</sup></b>                            | 0.29  |       |       |       |       |       |       |       |       |       |       |       |       |       |
|                               | <b>FeOH<sup>2+</sup></b>                          | 0.06  |       |       |       |       |       |       |       |       |       |       |       | 0.90  |       |
|                               | <b>Fe(OH)<sub>2</sub><sup>+</sup></b>             |       |       |       |       |       |       |       |       |       |       |       |       | 1.13  |       |
|                               | <b>FeCl<sup>2+</sup></b>                          | 0.01  | 0.13  | 0.08  | 0.64  | 0.07  |       |       |       | 0.42  | 0.17  |       |       | 0.18  |       |
|                               | <b>FeSO<sub>4</sub><sup>+</sup></b>               | 1.37  | 5.46  | 4.49  | 18.24 | 4.99  | 0.01  | 0.30  | 0.01  | 7.35  | 5.42  | 0.77  | 0.38  | 0.36  | 0.36  |
|                               | <b>Fe(SO<sub>4</sub>)<sub>2</sub><sup>-</sup></b> | 0.15  | 0.51  | 0.71  | 1.33  | 0.57  |       | 0.03  |       | 0.45  | 0.71  | 0.19  | 0.08  |       | 0.04  |
|                               | <b>FeH<sub>2</sub>PO<sub>4</sub><sup>2+</sup></b> | 0.08  | 0.19  | 0.04  | 0.20  | 0.12  |       |       |       | 0.34  | 0.02  |       | 0.01  |       | 0.02  |
|                               | <b>FeHPO<sub>4</sub><sup>+</sup></b>              | 0.43  | 0.25  | 0.02  | 0.02  | 0.21  | 0.17  | 0.62  | 0.04  | 0.37  | 0.01  |       | 0.93  |       | 3.05  |
|                               | <b>Fe-(Malonate)<sub>3</sub><sup>3-</sup></b>     | 0.03  |       |       |       |       |       |       |       |       |       |       |       |       |       |
|                               | <b>Fe-(Malonate)<sub>2</sub><sup>-</sup></b>      | 9.04  |       |       |       |       |       | 88.51 | 45.66 | 88.52 |       | 25.60 | 74.86 | 9.00  | 69.07 |
|                               | <b>Fe-Malonate<sup>+</sup></b>                    | 15.44 | 0.15  | 0.03  | 0.01  | 0.42  | 4.29  | 15.81 | 4.15  | 0.14  | 0.08  | 11.84 | 15.19 | 84.86 | 21.64 |
|                               | <b>Fe-Succinate<sup>+</sup></b>                   |       |       |       |       |       |       | 0.22  |       |       |       |       |       | 0.85  | 0.03  |

|               |                                                    |       |       |       |       |       |       |       |       |       |       |       |       |       |       |
|---------------|----------------------------------------------------|-------|-------|-------|-------|-------|-------|-------|-------|-------|-------|-------|-------|-------|-------|
|               | <b>Fe-(Oxalate)<sub>3</sub><sup>3-</sup></b>       | 9.09  |       |       |       |       |       | 0.06  |       |       |       | 0.63  |       |       |       |
|               | <b>Fe-(Oxalate)<sub>2</sub><sup>2-</sup></b>       | 40.53 | 42.36 | 55.30 | 17.02 | 47.01 | 6.19  | 28.31 | 6.45  | 32.44 | 50.46 | 49.07 | 5.55  | 0.02  | 2.69  |
|               | <b>Fe-Oxalate<sup>+</sup></b>                      | 23.49 | 50.96 | 39.32 | 62.54 | 46.60 | 0.82  | 8.96  | 0.81  | 58.50 | 43.15 | 11.88 | 3.00  | 2.69  | 3.09  |
| <b>Fe(II)</b> | <b>Fe<sup>2+</sup></b>                             | 73.57 | 10.47 | 7.63  | 12.30 | 10.10 | 9.63  | 26.53 | 12.54 | 10.10 | 7.76  | 21.97 | 5.45  | 72.43 | 9.40  |
|               | <b>FeCl<sup>+</sup></b>                            | 0.25  | 19.22 | 17.36 | 28.02 | 13.14 | 8.18  | 1.80  | 5.37  | 32.23 | 28.18 | 2.04  | 4.03  | 24.27 | 5.65  |
|               | <b>FeSO<sub>4</sub> (aq)</b>                       | 25.05 | 52.87 | 68.23 | 53.38 | 61.90 | 52.58 | 67.96 | 71.81 | 38.10 | 61.78 | 75.53 | 68.52 | 3.26  | 53.28 |
|               | <b>FeH<sub>2</sub>PO<sub>4</sub><sup>+</sup></b>   | 0.97  | 17.26 | 6.57  | 6.23  | 14.65 | 27.54 | 2.91  | 7.47  | 19.45 | 2.09  |       | 21.71 |       | 31.41 |
|               | <b>Fe-Malonate (aq)</b>                            |       |       |       |       |       |       | 0.65  | 0.11  | 0.88  |       | 0.04  | 0.09  | 0.03  | 0.10  |
|               | <b>Fe-Oxalate (aq)</b>                             | 0.14  | 0.17  | 0.21  | 0.07  | 0.19  | 1.41  | 0.70  | 1.93  | 0.11  | 0.18  | 0.42  | 0.20  |       | 0.16  |
|               | <b>Fe-Acetate<sup>+</sup></b>                      |       | 0.02  |       |       | 0.02  |       |       |       |       |       |       |       |       |       |
| <b>Mn(II)</b> | <b>Mn<sup>2+</sup></b>                             | 72.68 | 0.09  | 0.05  | 0.02  | 0.02  | 0.02  | 0.67  | 0.06  | 0.01  | 0.01  | 3.27  | 0.09  | 2.84  | 0.02  |
|               | <b>MnCl<sub>3</sub><sup>-</sup></b>                |       | 0.03  | 0.03  | 0.01  |       |       |       |       | 0.02  | 0.03  |       |       |       |       |
|               | <b>MnCl<sub>2</sub> (aq)</b>                       |       | 0.16  | 0.14  | 0.06  | 0.02  |       |       |       | 0.06  | 0.09  | 0.05  | 0.03  | 0.17  |       |
|               | <b>MnCl<sup>+</sup></b>                            | 0.40  | 0.25  | 0.18  | 0.08  | 0.04  | 0.03  | 0.07  | 0.04  | 0.06  | 0.08  | 0.48  | 0.10  | 1.51  | 0.02  |
|               | <b>MnSO<sub>4</sub> (aq)</b>                       | 17.55 | 0.31  | 0.31  | 0.07  | 0.08  | 0.08  | 1.22  | 0.25  | 0.03  | 0.08  | 8.01  | 0.77  | 0.09  | 0.06  |
|               | <b>MnNO<sub>3</sub><sup>+</sup></b>                | 7.24  | 6.41  | 4.89  | 3.26  | 3.09  | 3.20  | 12.02 | 5.38  | 2.43  | 2.61  | 18.50 | 6.44  | 30.92 | 2.79  |
|               | <b>Mn(NO<sub>3</sub>)<sub>2</sub> (aq)</b>         | 2.01  | 92.75 | 94.40 | 96.50 | 96.75 | 96.66 | 86.00 | 94.25 | 97.38 | 97.10 | 69.63 | 92.57 | 64.47 | 97.11 |
|               | <b>Mn-Oxalate (aq)</b>                             | 0.11  |       |       |       |       |       | 0.01  |       |       |       | 0.05  |       |       |       |
| <b>Ni(II)</b> | <b>Ni<sup>2+</sup></b>                             | 66.82 |       | 0.60  | 0.40  | 0.39  | 0.39  | 3.11  | 0.66  | 0.30  | 0.32  | 7.47  | 0.76  | 5.40  | 0.35  |
|               | <b>NiCl<sup>+</sup></b>                            | 0.13  |       | 0.76  | 0.52  | 0.28  | 0.19  | 0.12  | 0.16  | 0.54  | 0.65  | 0.39  | 0.32  | 1.02  | 0.12  |
|               | <b>NiCl<sub>2</sub> (aq)</b>                       |       |       | 0.01  |       |       |       |       |       | 0.01  | 0.02  |       |       |       |       |
|               | <b>NiSO<sub>4</sub> (aq)</b>                       | 19.78 |       | 4.62  | 1.50  | 2.05  | 1.85  | 6.90  | 3.27  | 0.96  | 2.15  | 22.03 | 8.14  | 0.21  | 1.68  |
|               | <b>Ni(SO<sub>4</sub>)<sub>2</sub><sup>2-</sup></b> | 0.02  |       |       |       |       |       |       |       |       |       | 0.01  |       |       |       |
|               | <b>NiNO<sub>3</sub><sup>+</sup></b>                | 10.55 |       | 93.74 | 97.54 | 97.14 | 95.96 | 88.34 | 93.29 | 98.13 | 96.75 | 66.98 | 89.48 | 93.32 | 97.58 |
|               | <b>NiH<sub>2</sub>PO<sub>4</sub><sup>+</sup></b>   | 0.02  |       |       |       |       | 0.02  |       |       |       |       |       | 0.05  |       | 0.02  |
|               | <b>NiH-Malonate<sup>+</sup></b>                    | 0.64  |       | 0.02  |       | 0.02  | 0.51  | 0.17  | 0.71  |       |       | 0.84  | 0.74  | 0.02  | 0.14  |
|               | <b>Ni-Malonate (aq)</b>                            | 0.06  |       |       |       |       | 0.20  | 0.10  | 0.35  |       |       | 0.10  | 0.10  | 0.02  | 0.03  |

|               |                                                    |       |       |       |       |       |       |       |       |       |       |       |       |       |
|---------------|----------------------------------------------------|-------|-------|-------|-------|-------|-------|-------|-------|-------|-------|-------|-------|-------|
|               | <b>NiH-Succinate<sup>+</sup></b>                   |       |       |       |       | 0.01  | 0.03  | 0.02  |       |       |       |       |       |       |
|               | <b>Ni-(Oxalate)<sub>2</sub><sup>2-</sup></b>       | 0.01  |       |       |       |       |       |       |       |       |       |       |       |       |
|               | <b>Ni-Oxalate (aq)</b>                             | 1.98  | 0.25  | 0.03  | 0.11  | 0.87  | 1.24  | 1.53  | 0.05  | 0.11  | 2.17  | 0.42  | 0.01  | 0.09  |
| <b>Pb(II)</b> | <b>Pb<sup>2+</sup></b>                             | 29.46 | 0.01  |       |       |       |       | 0.09  |       |       | 0.45  | 0.01  | 0.35  | 0.06  |
|               | <b>PbCl<sup>+</sup></b>                            | 4.48  | 0.93  | 0.69  | 0.31  | 0.15  | 0.11  | 0.27  | 0.16  | 0.25  | 0.32  | 1.94  | 0.42  | 5.72  |
|               | <b>PbCl<sub>2</sub> (aq)</b>                       | 0.08  | 0.63  | 0.58  | 0.27  | 0.07  | 0.04  | 0.01  | 0.03  | 0.30  | 0.44  | 0.23  | 0.12  | 0.73  |
|               | <b>PbCl<sub>3</sub><sup>-</sup></b>                |       | 0.32  | 0.37  | 0.17  | 0.03  |       |       |       | 0.26  | 0.44  | 0.03  | 0.02  | 0.07  |
|               | <b>PbCl<sub>4</sub><sup>2-</sup></b>               |       |       | 0.01  |       |       |       |       |       | 0.01  | 0.02  |       |       |       |
|               | <b>PbSO<sub>4</sub> (aq)</b>                       | 25.55 | 0.15  | 0.15  | 0.03  | 0.04  | 0.04  | 0.57  | 0.12  | 0.02  | 0.04  | 3.75  | 0.36  | 0.04  |
|               | <b>Pb(SO<sub>4</sub>)<sub>2</sub><sup>2-</sup></b> | 3.77  |       |       |       |       |       | 0.01  |       |       |       | 0.33  |       |       |
|               | <b>PbNO<sub>3</sub><sup>+</sup></b>                | 29.11 | 8.37  | 6.48  | 4.41  | 4.12  | 4.31  | 15.79 | 7.17  | 3.31  | 3.54  | 24.92 | 8.69  | 37.32 |
|               | <b>Pb(NO<sub>3</sub>)<sub>2</sub> (aq)</b>         | 5.97  | 89.54 | 91.66 | 94.78 | 95.58 | 95.48 | 83.20 | 92.48 | 95.86 | 95.20 | 68.13 | 90.35 | 55.78 |
|               | <b>PbH<sub>2</sub>PO<sub>4</sub><sup>+</sup></b>   | 0.03  |       |       |       |       |       |       |       |       |       |       |       |       |
|               | <b>PbH-Malonate<sup>+</sup></b>                    | 0.33  |       |       |       |       |       |       | 0.01  |       |       | 0.06  | 0.01  |       |
|               | <b>Pb-Malonate (aq)</b>                            | 0.01  |       |       |       |       |       |       |       |       |       |       |       |       |
|               | <b>PbH-Oxalate<sup>+</sup></b>                     | 0.13  | 0.02  | 0.06  | 0.02  |       |       |       |       |       |       | 0.02  |       |       |
|               | <b>Pb-Oxalate (aq)</b>                             | 1.04  |       |       |       |       |       | 0.04  | 0.02  |       |       | 0.15  |       |       |
|               | <b>Pb-Acetate<sup>+</sup></b>                      | 0.03  |       |       |       |       |       |       |       |       |       |       |       |       |
| <b>Zn(II)</b> | <b>Zn<sup>2+</sup></b>                             | 61.55 | 0.36  | 0.23  | 0.12  | 0.11  | 0.12  | 1.93  | 0.28  | 0.07  | 0.08  | 5.58  | 0.36  | 4.14  |
|               | <b>ZnCl<sup>+</sup></b>                            | 0.82  | 2.58  | 2.09  | 1.09  | 0.56  | 0.39  | 0.51  | 0.47  | 0.92  | 1.18  | 2.08  | 1.07  | 5.69  |
|               | <b>ZnCl<sub>4</sub><sup>2-</sup></b>               |       |       | 0.01  |       |       |       |       |       | 0.02  | 0.03  |       |       |       |
|               | <b>ZnCl<sub>3</sub><sup>-</sup></b>                |       | 0.22  | 0.30  | 0.17  | 0.02  |       |       |       | 0.30  | 0.49  |       | 0.02  | 0.02  |
|               | <b>ZnCl<sub>2</sub> (aq)</b>                       |       | 0.35  | 0.38  | 0.22  | 0.05  | 0.03  |       | 0.02  | 0.27  | 0.39  | 0.06  | 0.07  | 0.19  |
|               | <b>ZnSO<sub>4</sub> (aq)</b>                       | 19.73 | 1.73  | 1.95  | 0.48  | 0.64  | 0.60  | 4.64  | 1.49  | 0.25  | 0.59  | 17.88 | 4.19  | 0.17  |
|               | <b>Zn(SO<sub>4</sub>)<sub>2</sub><sup>2-</sup></b> | 5.08  | 0.02  | 0.04  |       | 0.01  |       | 0.17  | 0.02  |       | 0.01  | 2.66  | 0.12  |       |
|               | <b>ZnNO<sub>3</sub><sup>+</sup></b>                | 11.18 | 48.59 | 41.42 | 32.44 | 32.25 | 32.62 | 62.57 | 44.94 | 26.15 | 27.28 | 56.01 | 47.13 | 78.31 |
|               | <b>Zn(NO<sub>3</sub>)<sub>2</sub> (aq)</b>         | 0.20  | 46.10 | 53.51 | 65.45 | 66.33 | 65.95 | 29.66 | 52.14 | 72.01 | 69.93 | 14.38 | 46.65 | 11.45 |
|               | <b>ZnH-Malonate<sup>+</sup></b>                    | 0.44  |       |       |       |       |       | 0.11  | 0.08  | 0.22  |       | 0.47  | 0.26  | 0.01  |

|                                  |      |      |      |      |      |      |      |      |      |      |      |
|----------------------------------|------|------|------|------|------|------|------|------|------|------|------|
| <b>Zn-Malonate (aq)</b>          | 0.03 |      |      |      | 0.03 | 0.03 | 0.07 |      | 0.04 | 0.02 |      |
| <b>ZnH-Succinate<sup>+</sup></b> |      |      |      |      |      | 0.03 | 0.01 |      |      |      |      |
| <b>Zn-Oxalate (aq)</b>           | 0.96 | 0.05 | 0.05 | 0.02 | 0.14 | 0.40 | 0.34 | 0.02 | 0.85 | 0.11 | 0.01 |

---

\*Sample from the 12/03/2019 was collected in conditions of low RH (<40%) so that an aerosol liquid water content could not be calculated

**Table S8. Amount in percentage of the metal predicted to form solid precipitates\* in deliquescent aerosol, obtained with the model Visual Minteq.**

| <b>Date</b> | <b>Ca</b> | <b>Pb</b> | <b>Mn</b> | <b>Fe</b> | <b>Al</b> |
|-------------|-----------|-----------|-----------|-----------|-----------|
| 01/02/2019  | 28.2      | 0.0       | 0.0       | 0.0       | 0.0       |
| 05/02/2019  | 85.8      | 0.0       | 0.0       | 0.0       | 0.0       |
| 08/02/2019  | 89.8      | 0.0       | 0.0       | 0.0       | 0.0       |
| 12/02/2019  | 85.1      | 0.0       | 0.0       | 0.0       | 0.0       |
| 14/02/2019  | 50.4      | 0.0       | 0.0       | 0.0       | 0.0       |
| 18/02/2019  | 79.8      | 3.4       | 0.0       | 0.0       | 0.0       |
| 20/02/2019  | 48.7      | 0.0       | 26.4      | 0.0       | 0.0       |
| 22/02/2019  | 77.6      | 0.0       | 27.9      | 0.0       | 0.0       |
| 26/02/2019  | 52.9      | 0.0       | 0.0       | 0.0       | 0.0       |
| 28/02/2019  | 40.1      | 0.0       | 0.0       | 0.0       | 0.0       |
| 04/03/2019  | 74.8      | 0.0       | 0.0       | 0.0       | 0.0       |
| 06/03/2019  | 67.8      | 0.0       | 33.2      | 0.0       | 0.0       |
| 08/03/2019  | 48.4      | 0.0       | 0.0       | 98.2      | 46.4      |
| 12/03/2019  |           |           |           |           |           |
| 14/03/2019  | 53.2      | 0.0       | 19.0      | 0.0       | 0.0       |

\*Solids predicted to form in deliquescent aerosol are: calcium oxalate ( $\text{CaC}_2\text{O}_4 \cdot \text{H}_2\text{O}$ ), gypsum ( $\text{CaSO}_4 \cdot 2\text{H}_2\text{O}$ ), chloropyromorphite ( $\text{Pb}_5(\text{PO}_4)_3\text{Cl}$ ), manganese hydrogen phosphate ( $\text{MnHPO}_4$ ), ferrihydrite ( $\text{Fe}_2\text{O}_3 \cdot 0.5\text{H}_2\text{O}$ ), and aluminium hydroxide sulphate ( $\text{AlOHSO}_4$ ).

**Table S9. Speciation of each metal in simulated fog water, obtained with the model Visual Minteq, as percent distribution of the different chemical species.**

| Component      | Species name                                   | 01/02/<br>2019 | 05/02/<br>2019 | 08/02/<br>2019 | 12/02/<br>2019 | 14/02/<br>2019 | 18/02/<br>2019 | 20/02/<br>2019 | 22/02/<br>2019 | 26/02/<br>2019 | 28/02/<br>2019 | 04/03/<br>2019 | 06/03/<br>2019 | 08/03/<br>2019 | 12/03/<br>2019 | 14/03/<br>2019 |  |
|----------------|------------------------------------------------|----------------|----------------|----------------|----------------|----------------|----------------|----------------|----------------|----------------|----------------|----------------|----------------|----------------|----------------|----------------|--|
| <b>Al(III)</b> | <b>Al<sup>3+</sup></b>                         | 2.08           | 4.52           | 1.10           | 6.24           | 1.48           | 0.23           | 0.45           | 0.29           | 1.19           | 0.53           | 0.23           | 0.22           | 0.78           | 17.49          | 0.64           |  |
|                | <b>AlOH<sup>2+</sup></b>                       | 0.25           | 0.53           | 0.12           | 0.73           | 0.16           | 0.02           | 0.05           | 0.03           | 0.13           | 0.06           | 0.02           | 0.02           | 0.09           | 2.07           | 0.07           |  |
|                | <b>Al(OH)<sub>2</sub><sup>+</sup></b>          |                | 0.02           |                | 0.02           |                |                |                |                |                |                |                |                |                | 0.06           |                |  |
|                | <b>AlSO<sub>4</sub><sup>+</sup></b>            | 0.15           | 0.34           | 0.17           | 0.50           | 0.20           | 0.05           | 0.11           | 0.07           | 0.14           | 0.09           | 0.07           | 0.06           | 0.08           | 0.73           | 0.07           |  |
|                | <b>AlHPO<sub>4</sub><sup>+</sup></b>           |                | 0.06           | 0.03           | 0.09           | 0.04           |                |                |                |                | 0.04           |                |                |                |                |                |  |
|                | <b>Al-(Malonate)<sub>2</sub><sup>-</sup></b>   | 0.01           |                |                |                |                | 0.03           | 0.02           | 0.04           |                |                |                |                |                |                |                |  |
|                | <b>Al-Malonate<sup>+</sup></b>                 | 2.20           | 0.62           | 0.87           | 0.87           | 1.31           | 0.94           | 1.08           | 1.26           | 0.22           | 0.51           | 0.45           | 0.43           | 0.04           |                | 0.40           |  |
|                | <b>AlOH-Succinate (aq)</b>                     |                | 0.02           | 0.01           | 0.02           |                |                |                |                |                |                |                |                |                |                |                |  |
|                | <b>AlOH-(Oxalate)<sub>2</sub><sup>2-</sup></b> | 0.22           | 0.12           | 0.38           | 0.09           | 0.32           | 0.82           | 0.67           | 0.77           | 0.38           | 0.58           | 0.80           | 0.81           | 0.44           | 0.03           | 0.52           |  |
|                | <b>Al(OH)<sub>2</sub>-Oxalate<sup>-</sup></b>  | 2.04           | 2.20           | 1.84           | 2.20           | 1.92           | 1.12           | 1.40           | 1.20           | 1.86           | 1.52           | 1.15           | 1.13           | 1.73           | 2.00           | 1.62           |  |
|                | <b>AlOH-Oxalate</b>                            | 19.70          | 21.13          | 17.52          | 21.10          | 18.30          | 10.53          | 13.07          | 11.27          | 17.62          | 14.44          | 10.82          | 10.69          | 16.64          | 19.33          | 15.41          |  |
|                | <b>Al-(Oxalate)<sub>3</sub><sup>3-</sup></b>   | 0.03           |                | 0.10           |                | 0.07           | 0.80           | 0.42           | 0.66           | 0.10           | 0.28           | 0.73           | 0.75           | 0.14           |                | 0.21           |  |
|                | <b>Al-(Oxalate)<sub>2</sub><sup>-</sup></b>    | 15.74          | 8.52           | 26.12          | 6.23           | 21.93          | 53.76          | 43.31          | 50.48          | 25.98          | 39.10          | 53.48          | 53.98          | 31.24          | 1.81           | 35.46          |  |
|                | <b>Al-Oxalate<sup>+</sup></b>                  | 57.55          | 61.87          | 51.71          | 61.86          | 54.21          | 31.68          | 39.40          | 33.92          | 52.32          | 42.87          | 32.26          | 31.89          | 48.81          | 56.48          | 45.58          |  |
|                | <b>AlOH-Acetate<sup>+</sup></b>                | 0.01           | 0.05           | 0.03           | 0.05           | 0.04           |                |                |                |                | 0.01           |                |                |                |                |                |  |
| <b>Cr(III)</b> | <b>Cr(OH)<sub>2</sub><sup>+</sup></b>          | 0.55           | 0.54           | 0.51           | 0.54           | 0.50           | 0.46           | 0.46           | 0.46           | 0.51           | 0.50           | 0.49           | 0.49           | 0.55           | 0.56           | 0.52           |  |
|                | <b>Cr<sup>3+</sup></b>                         | 25.57          | 25.48          | 25.29          | 25.79          | 25.55          | 26.96          | 27.11          | 27.07          | 26.68          | 26.46          | 26.53          | 26.35          | 26.16          | 25.92          | 26.24          |  |
|                | <b>CrOH<sup>2+</sup></b>                       | 72.15          | 71.10          | 67.93          | 71.50          | 67.33          | 65.72          | 65.63          | 65.83          | 69.45          | 68.86          | 67.69          | 67.14          | 72.23          | 73.04          | 69.61          |  |
|                | <b>Cr(OH)<sub>3</sub> (aq)</b>                 | 0.01           | 0.01           | 0.01           | 0.01           | 0.01           |                |                |                | 0.01           | 0.01           | 0.01           | 0.01           | 0.01           | 0.01           | 0.01           |  |
|                | <b>CrSO<sub>4</sub><sup>+</sup></b>            | 0.65           | 0.69           | 1.44           | 0.74           | 1.24           | 2.04           | 2.41           | 2.21           | 1.12           | 1.68           | 2.92           | 2.45           | 0.95           | 0.39           | 1.02           |  |
|                | <b>CrOHSO<sub>4</sub> (aq)</b>                 | 0.04           | 0.04           | 0.09           | 0.05           | 0.08           | 0.13           | 0.15           | 0.14           | 0.07           | 0.11           | 0.18           | 0.15           | 0.06           | 0.03           | 0.06           |  |
|                | <b>Cr-Acetate<sup>2+</sup></b>                 | 1.02           | 2.13           | 4.73           | 1.37           | 5.30           | 4.68           | 4.24           | 4.28           | 2.16           | 2.38           | 2.18           | 3.42           | 0.05           | 0.06           | 2.54           |  |
| <b>Cu(II)</b>  | <b>Cu<sup>2+</sup></b>                         | 75.31          | 86.68          | 63.86          | 89.75          | 68.85          | 33.48          | 44.98          | 36.47          | 65.54          | 49.64          | 34.07          | 33.62          | 58.60          | 96.49          | 53.78          |  |
|                | <b>CuOH<sup>+</sup></b>                        | 0.04           | 0.05           | 0.03           | 0.05           | 0.04           | 0.02           | 0.02           | 0.02           | 0.03           | 0.03           | 0.02           | 0.02           | 0.03           | 0.05           | 0.03           |  |
|                | <b>CuSO<sub>4</sub> (aq)</b>                   | 0.25           | 0.31           | 0.49           | 0.34           | 0.46           | 0.37           | 0.59           | 0.44           | 0.38           | 0.44           | 0.53           | 0.44           | 0.28           | 0.19           | 0.29           |  |

|                |                                                  |       |       |       |       |       |       |       |       |       |       |       |       |       |       |       |
|----------------|--------------------------------------------------|-------|-------|-------|-------|-------|-------|-------|-------|-------|-------|-------|-------|-------|-------|-------|
|                | <b>CuNO<sub>3</sub><sup>+</sup></b>              | 0.01  | 0.02  | 0.04  | 0.03  | 0.08  | 0.11  | 0.15  | 0.12  | 0.10  | 0.07  | 0.05  | 0.06  |       |       | 0.06  |
|                | <b>CuH-Malonate<sup>+</sup></b>                  | 0.01  |       |       |       | 0.01  | 0.03  | 0.02  | 0.03  |       |       | 0.01  | 0.01  |       |       |       |
|                | <b>Cu-Malonate (aq)</b>                          | 2.16  | 0.32  | 1.42  | 0.34  | 1.74  | 4.09  | 3.28  | 4.90  | 0.35  | 1.39  | 2.00  | 1.95  | 0.08  |       | 0.95  |
|                | <b>Cu-(Oxalate)<sub>2</sub><sup>2-</sup></b>     | 0.51  | 0.15  | 1.46  | 0.08  | 1.01  | 8.66  | 4.88  | 7.25  | 1.45  | 3.71  | 8.41  | 8.65  | 2.16  |       | 2.92  |
|                | <b>Cu-Oxalate (aq)</b>                           | 21.70 | 12.46 | 32.65 | 9.39  | 27.78 | 53.21 | 46.05 | 50.73 | 32.13 | 44.69 | 54.89 | 55.23 | 38.82 | 3.25  | 41.94 |
|                | <b>CuH-Oxalate<sup>+</sup></b>                   |       |       | 0.01  |       | 0.01  | 0.02  | 0.02  | 0.02  | 0.01  | 0.02  | 0.02  | 0.02  | 0.02  |       | 0.02  |
| <b>Fe(III)</b> | <b>Fe<sup>3+</sup></b>                           | 0.03  | 0.05  | 0.02  | 0.05  | 0.03  |       |       |       | 0.02  |       |       |       | 0.01  | 0.06  | 0.01  |
|                | <b>FeOH<sup>2+</sup></b>                         | 6.95  | 10.36 | 3.99  | 11.35 | 5.14  | 0.59  | 1.30  | 0.75  | 4.20  | 1.75  | 0.61  | 0.59  | 2.93  | 13.13 | 2.23  |
|                | <b>Fe(OH)<sub>2</sub><sup>+</sup></b>            | 43.25 | 64.10 | 24.10 | 69.93 | 30.72 | 3.35  | 7.40  | 4.25  | 24.91 | 10.35 | 3.58  | 3.44  | 18.03 | 81.74 | 13.38 |
|                | <b>FeHPO<sub>4</sub><sup>+</sup></b>             | 0.05  | 0.28  | 0.22  | 0.34  | 0.27  | 0.03  | 0.03  | 0.02  | 0.30  | 0.03  |       | 0.02  |       |       | 0.03  |
|                | <b>Fe-(Malonate)<sub>2</sub><sup>-</sup></b>     | 0.47  | 0.01  | 0.17  | 0.01  | 0.29  | 0.83  | 0.66  | 1.27  | 0.01  | 0.12  | 0.19  | 0.18  |       |       | 0.06  |
|                | <b>Fe-Malonate<sup>+</sup></b>                   | 3.78  | 0.73  | 1.70  | 0.82  | 2.50  | 1.40  | 1.85  | 1.96  | 0.43  | 0.94  | 0.69  | 0.66  | 0.08  |       | 0.76  |
|                | <b>Fe-Succinate<sup>+</sup></b>                  |       | 0.07  | 0.08  | 0.05  | 0.06  | 0.01  | 0.02  | 0.01  | 0.06  | 0.02  |       |       |       |       | 0.02  |
|                | <b>Fe-(Oxalate)<sub>3</sub><sup>3-</sup></b>     | 0.40  | 0.08  | 1.52  | 0.03  | 1.03  | 9.35  | 5.67  | 8.03  | 1.57  | 4.04  | 8.65  | 8.87  | 2.21  |       | 3.14  |
|                | <b>Fe-(Oxalate)<sub>2</sub><sup>-</sup></b>      | 25.11 | 9.43  | 47.69 | 5.51  | 39.01 | 74.85 | 69.34 | 73.04 | 47.64 | 66.81 | 76.28 | 76.42 | 57.28 | 0.65  | 62.82 |
|                | <b>Fe-Oxalate<sup>+</sup></b>                    | 19.95 | 14.88 | 20.52 | 11.88 | 20.96 | 9.59  | 13.71 | 10.67 | 20.86 | 15.92 | 10.00 | 9.81  | 19.45 | 4.41  | 17.55 |
| <b>Fe(II)</b>  | <b>Fe<sup>2+</sup></b>                           | 99.13 | 99.36 | 98.27 | 99.40 | 98.56 | 96.11 | 96.85 | 96.34 | 98.51 | 97.51 | 95.65 | 95.83 | 98.34 | 99.73 | 98.08 |
|                | <b>FeSO<sub>4</sub> (aq)</b>                     | 0.36  | 0.38  | 0.82  | 0.41  | 0.72  | 1.16  | 1.38  | 1.26  | 0.62  | 0.94  | 1.62  | 1.37  | 0.51  | 0.21  | 0.57  |
|                | <b>FeH<sub>2</sub>PO<sub>4</sub><sup>+</sup></b> |       |       | 0.01  |       |       |       |       |       | 0.01  |       |       |       |       |       |       |
|                | <b>Fe-Malonate (aq)</b>                          |       |       |       |       |       | 0.04  | 0.02  | 0.04  |       |       | 0.02  | 0.02  |       |       |       |
|                | <b>Fe-Oxalate (aq)</b>                           | 0.50  | 0.25  | 0.88  | 0.18  | 0.70  | 2.69  | 1.74  | 2.36  | 0.85  | 1.54  | 2.71  | 2.77  | 1.15  | 0.06  | 1.34  |
| <b>Mn(II)</b>  | <b>Mn<sup>2+</sup></b>                           | 99.32 | 99.51 | 98.66 | 99.54 | 98.86 | 96.81 | 97.43 | 97.01 | 98.80 | 98.01 | 96.55 | 96.68 | 98.70 | 99.80 | 98.45 |
|                | <b>MnSO<sub>4</sub> (aq)</b>                     | 0.25  | 0.27  | 0.59  | 0.29  | 0.51  | 0.83  | 0.98  | 0.90  | 0.44  | 0.67  | 1.16  | 0.98  | 0.37  | 0.15  | 0.41  |
|                | <b>MnNO<sub>3</sub><sup>+</sup></b>              |       | 0.01  | 0.03  | 0.02  | 0.05  | 0.14  | 0.15  | 0.14  | 0.06  | 0.06  | 0.06  | 0.07  |       |       | 0.05  |
|                | <b>Mn-Malonate (aq)</b>                          |       |       |       |       |       | 0.03  | 0.02  | 0.04  |       |       | 0.02  | 0.02  |       |       |       |
|                | <b>Mn-Oxalate (aq)</b>                           | 0.41  | 0.20  | 0.72  | 0.15  | 0.57  | 2.18  | 1.42  | 1.91  | 0.69  | 1.25  | 2.21  | 2.25  | 0.93  | 0.05  | 1.09  |
| <b>Ni(II)</b>  | <b>Ni<sup>2+</sup></b>                           | 92.54 | 95.98 | 87.36 | 96.92 | 89.66 | 69.33 | 77.49 | 71.95 | 87.92 | 79.96 | 69.00 | 68.68 | 84.64 | 98.93 | 82.34 |

|               |                                              |       |       |       |       |       |       |       |       |       |       |       |       |       |       |       |
|---------------|----------------------------------------------|-------|-------|-------|-------|-------|-------|-------|-------|-------|-------|-------|-------|-------|-------|-------|
|               | <b>NiSO<sub>4</sub> (aq)</b>                 | 0.29  | 0.32  | 0.64  | 0.35  | 0.57  | 0.72  | 0.95  | 0.81  | 0.48  | 0.66  | 1.01  | 0.85  | 0.38  | 0.18  | 0.41  |
|               | <b>NiNO<sub>3</sub><sup>+</sup></b>          |       | 0.02  | 0.04  | 0.03  | 0.08  | 0.16  | 0.19  | 0.17  | 0.09  | 0.08  | 0.07  | 0.08  |       |       | 0.06  |
|               | <b>Ni-Malonate (aq)</b>                      | 0.06  |       | 0.04  |       | 0.05  | 0.19  | 0.13  | 0.22  | 0.01  | 0.05  | 0.09  | 0.09  |       |       | 0.03  |
|               | <b>Ni-(Oxalate)<sub>2</sub><sup>2-</sup></b> |       |       | 0.03  |       | 0.02  | 0.28  | 0.13  | 0.22  | 0.03  | 0.09  | 0.26  | 0.27  | 0.05  |       | 0.07  |
|               | <b>Ni-Oxalate (aq)</b>                       | 7.09  | 3.67  | 11.88 | 2.70  | 9.62  | 29.31 | 21.10 | 26.62 | 11.46 | 19.15 | 29.56 | 30.02 | 14.92 | 0.89  | 17.08 |
| <b>Pb(II)</b> | <b>Pb<sup>2+</sup></b>                       | 90.82 | 94.61 | 84.32 | 95.63 | 86.83 | 64.69 | 72.79 | 67.28 | 84.92 | 76.07 | 64.28 | 64.09 | 81.79 | 98.33 | 79.05 |
|               | <b>PbOH<sup>+</sup></b>                      | 0.06  | 0.06  | 0.05  | 0.06  | 0.05  | 0.04  | 0.04  | 0.04  | 0.05  | 0.04  | 0.04  | 0.04  | 0.05  | 0.06  | 0.05  |
|               | <b>PbCl<sup>+</sup></b>                      |       | 0.02  | 0.03  | 0.01  | 0.02  | 0.03  | 0.02  | 0.02  | 0.05  | 0.05  | 0.03  | 0.03  | 0.05  | 0.01  | 0.01  |
|               | <b>PbSO<sub>4</sub> (aq)</b>                 | 0.82  | 0.92  | 1.78  | 0.99  | 1.59  | 1.96  | 2.60  | 2.21  | 1.35  | 1.84  | 2.74  | 2.31  | 1.07  | 0.53  | 1.15  |
|               | <b>PbNO<sub>3</sub><sup>+</sup></b>          | 0.06  | 0.11  | 0.23  | 0.16  | 0.45  | 0.92  | 1.09  | 0.97  | 0.54  | 0.49  | 0.41  | 0.46  | 0.06  | 0.04  | 0.38  |
|               | <b>Pb-Malonate (aq)</b>                      | 0.03  |       | 0.02  |       | 0.03  | 0.09  | 0.06  | 0.10  |       | 0.02  | 0.04  | 0.04  |       |       | 0.02  |
|               | <b>Pb-Succinate (aq)</b>                     |       | 0.01  | 0.03  |       | 0.02  | 0.03  | 0.03  | 0.03  | 0.03  | 0.02  |       | 0.02  |       |       | 0.01  |
|               | <b>PbH-Oxalate<sup>+</sup></b>               |       |       |       |       |       | 0.01  |       | 0.01  |       |       | 0.01  | 0.01  |       |       |       |
|               | <b>Pb-(Oxalate)<sub>2</sub><sup>2-</sup></b> |       |       |       |       |       | 0.01  |       | 0.01  |       |       | 0.01  | 0.01  |       |       |       |
|               | <b>Pb-Oxalate (aq)</b>                       | 8.19  | 4.26  | 13.50 | 3.13  | 10.97 | 32.19 | 23.33 | 29.31 | 13.04 | 21.45 | 32.42 | 32.98 | 16.97 | 1.04  | 19.31 |
|               | <b>Pb-Acetate<sup>+</sup></b>                |       | 0.01  | 0.03  |       | 0.03  | 0.02  | 0.02  | 0.02  | 0.01  | 0.01  |       | 0.01  |       |       | 0.01  |
| <b>Zn(II)</b> | <b>Zn<sup>2+</sup></b>                       | 95.78 | 97.66 | 92.58 | 98.15 | 93.94 | 80.77 | 86.19 | 82.56 | 92.96 | 87.99 | 80.42 | 80.28 | 91.10 | 99.33 | 89.64 |
|               | <b>ZnSO<sub>4</sub> (aq)</b>                 | 0.32  | 0.36  | 0.73  | 0.38  | 0.64  | 0.92  | 1.15  | 1.01  | 0.55  | 0.79  | 1.28  | 1.08  | 0.45  | 0.20  | 0.49  |
|               | <b>ZnNO<sub>3</sub><sup>+</sup></b>          | 0.01  | 0.02  | 0.05  | 0.03  | 0.09  | 0.21  | 0.24  | 0.22  | 0.11  | 0.10  | 0.09  | 0.11  | 0.01  |       | 0.08  |
|               | <b>Zn-Malonate (aq)</b>                      | 0.03  |       | 0.02  |       | 0.03  | 0.11  | 0.07  | 0.12  |       | 0.03  | 0.05  | 0.05  |       |       | 0.02  |
|               | <b>Zn-(Oxalate)<sub>2</sub><sup>2-</sup></b> |       |       |       |       |       | 0.06  | 0.03  | 0.05  |       | 0.02  | 0.06  | 0.06  |       |       | 0.01  |
|               | <b>Zn-Oxalate (aq)</b>                       | 3.85  | 1.96  | 6.61  | 1.43  | 5.29  | 17.92 | 12.32 | 16.03 | 6.36  | 11.06 | 18.09 | 18.42 | 8.43  | 0.47  | 9.76  |



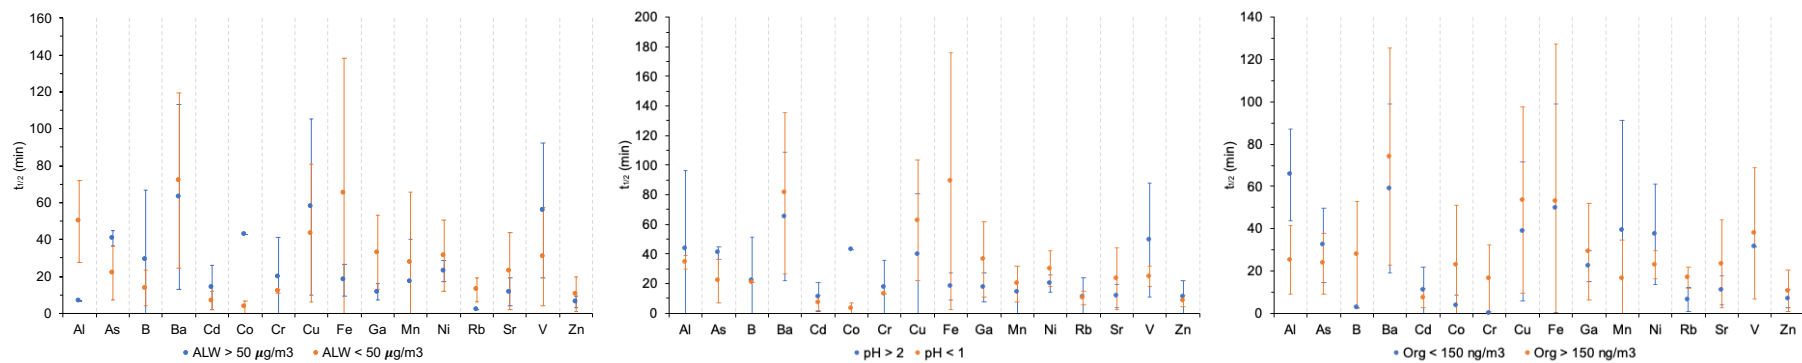

**Figure S1. Difference in solubilisation kinetics (average  $t_{1/2}$  and standard deviation across different samples) in samples with high and low ALW (left panel), less and more acidic conditions (central panel), high and low organic acid content (right panel).**

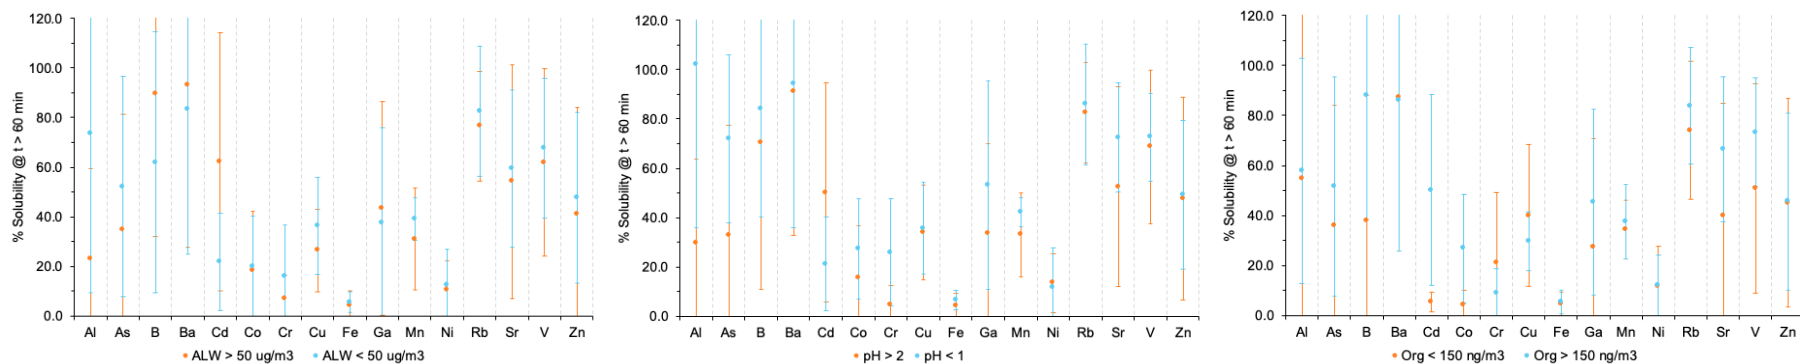

**Figure S2. Difference in solubility (average  $S_{\infty}$  and standard deviation across different samples) in samples with high and low ALW (left panel), less and more acidic conditions (central panel), high and low organic acid content (right panel).**

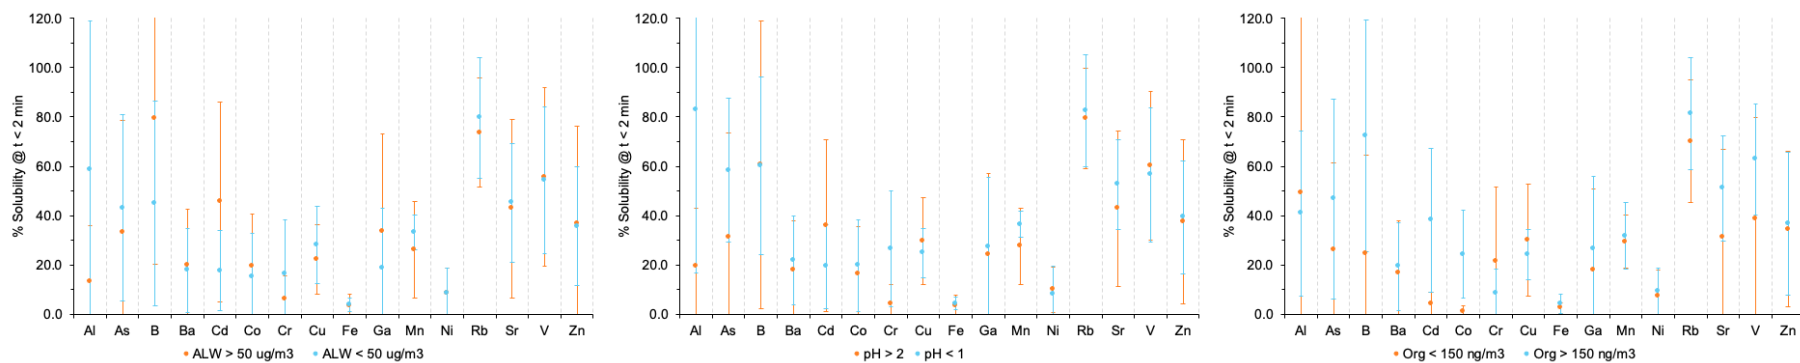

**Figure S3. Difference in solubility at  $t = 2$  min of the kinetics experiments (average  $S_0$  and standard deviation across different samples) in samples with high and low ALW (left panel), less and more acidic conditions (central panel), high and low organic acid content (right panel).**
